# Supplementary material
Source: PubMed Central journal article supplement (PMC2672607)
Supplement: pbio.1000089.sg009.pdf [file pbio.1000089.sg009.pdf]

Exp. 1 & 5: pre-surgical training  
on rapid-place-learning task

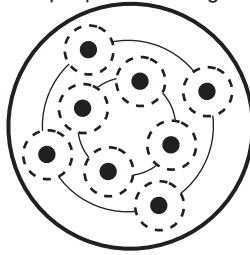

● Platform (12-cm diameter)

Exp. 1 & 5: post-surgical testing  
on rapid-place-learning task

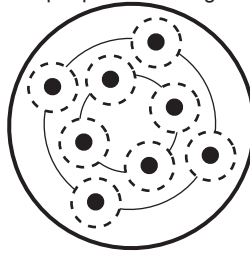

○ Zone for search-preference analysis (40-cm diameter)

Exp. 2: incremental-place-learning task  
& re-test on rapid-place-learning task

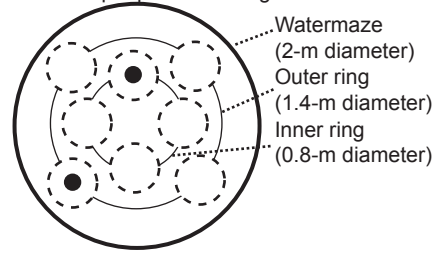

Watermaze  
(2-m diameter)  
Outer ring  
(1.4-m diameter)  
Inner ring  
(0.8-m diameter)
