# Supplementary material
Source: PubMed Central journal article supplement (PMC2672607)

**A**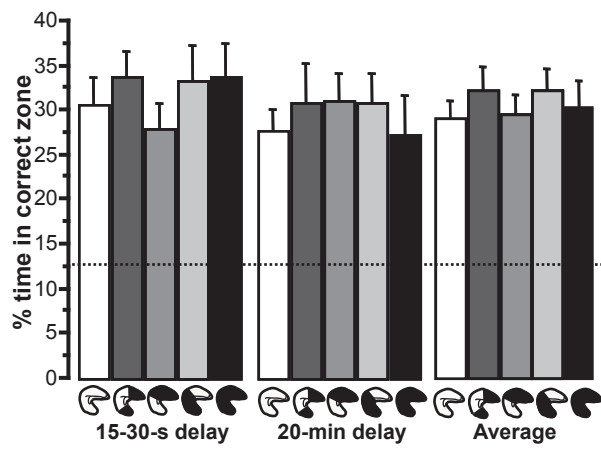**B**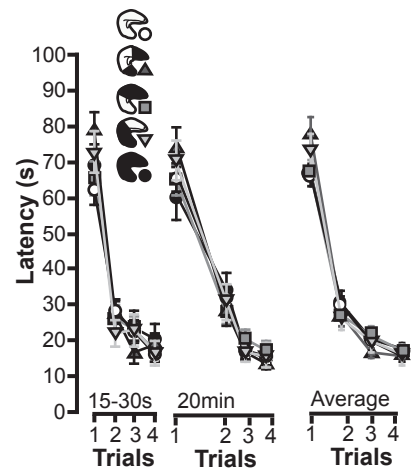

Supplement: pbio.1000089.sg001.pdf [file pbio.1000089.sg001.pdf]

**A**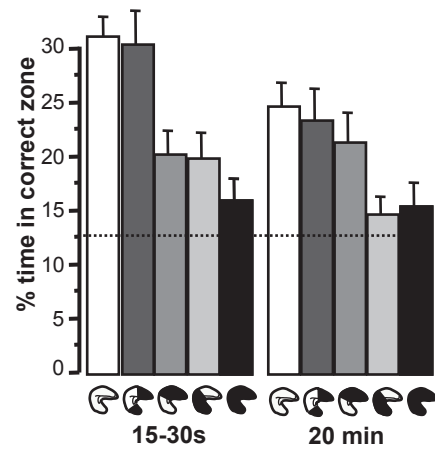**B**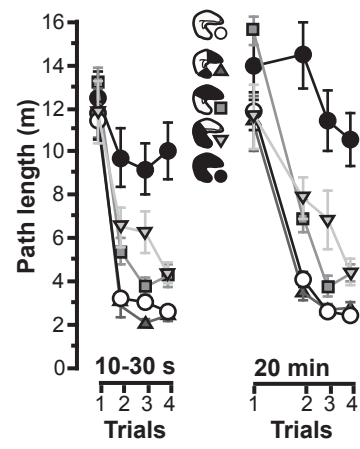

Supplement: pbio.1000089.sg002.pdf [file pbio.1000089.sg002.pdf]

**A**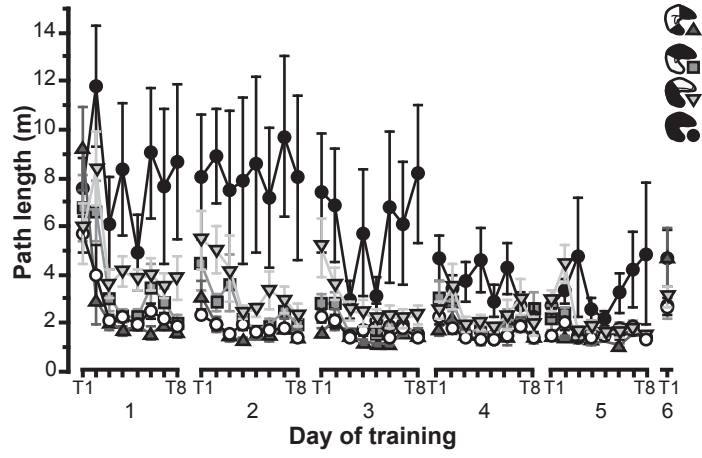**B**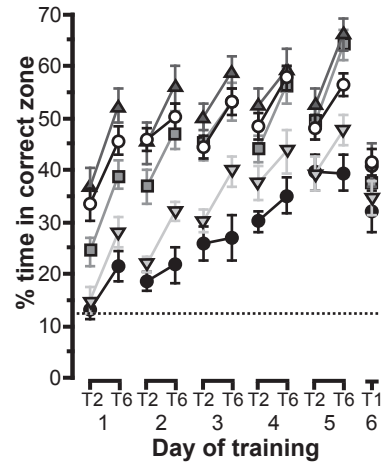

Supplement: pbio.1000089.sg003.pdf [file pbio.1000089.sg003.pdf]

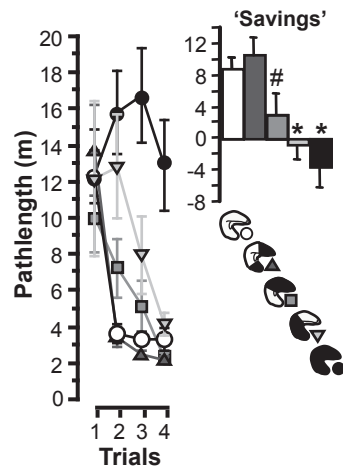

Supplement: pbio.1000089.sg004.pdf [file pbio.1000089.sg004.pdf]

A

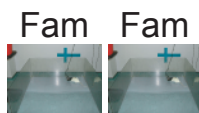

 Septal sparing

Rat 3

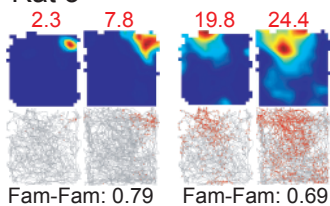

Rat 5

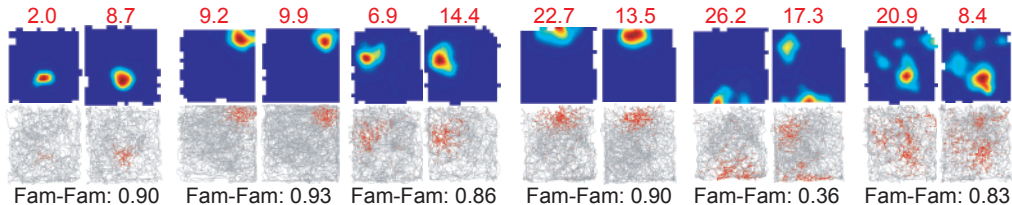

Rat 10

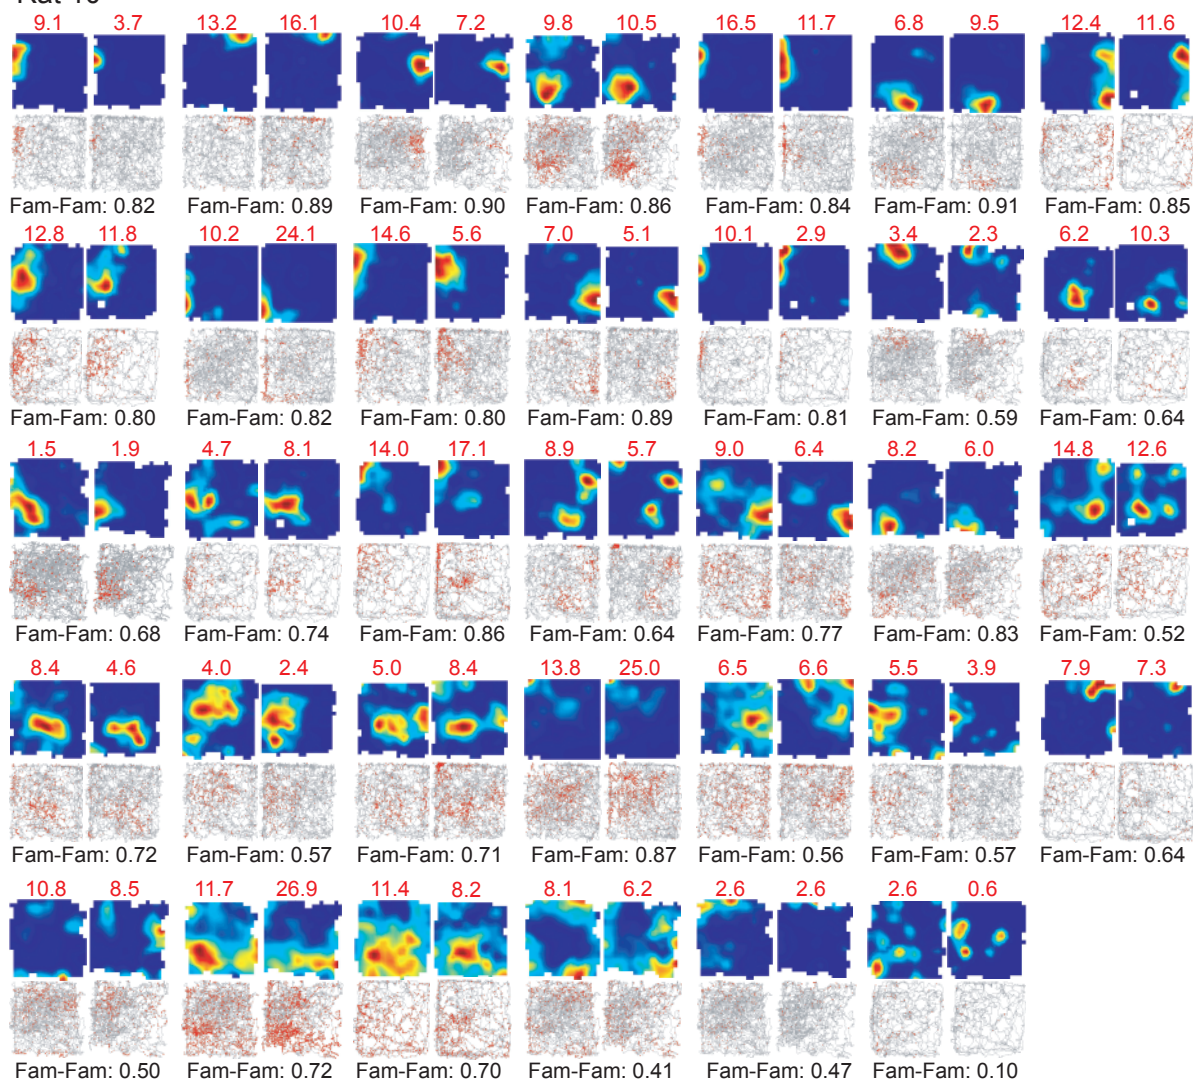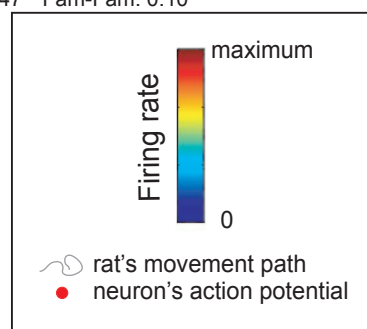

B

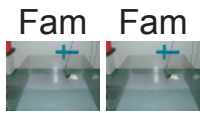

Intact hippoc.

Rat 4

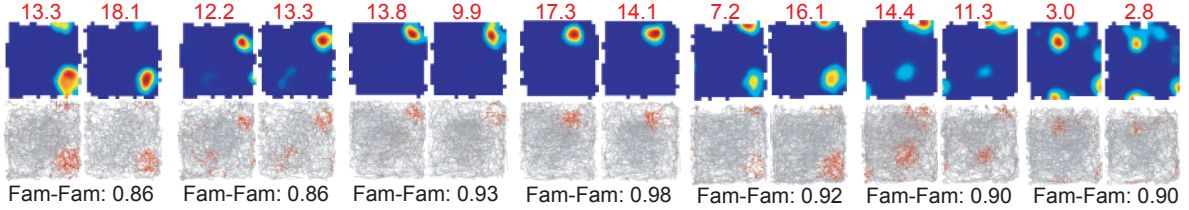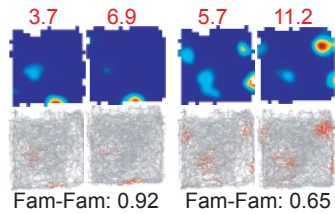

Rat 11

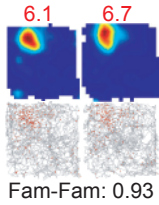

Rat 12

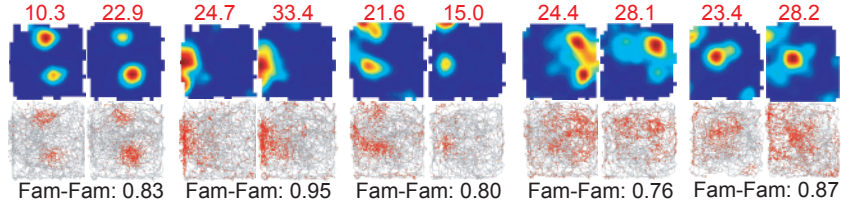

Rat 14

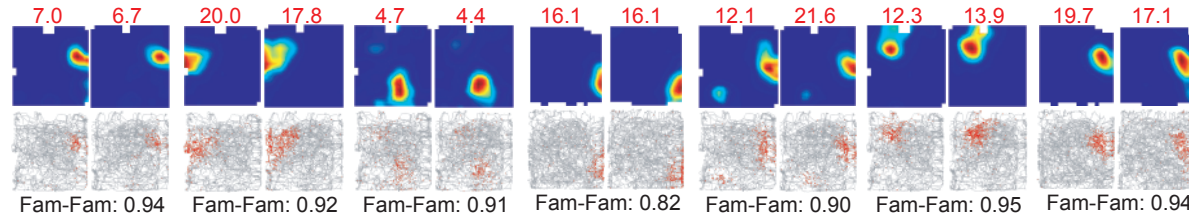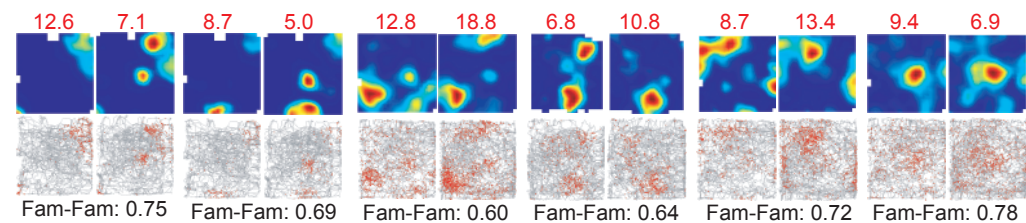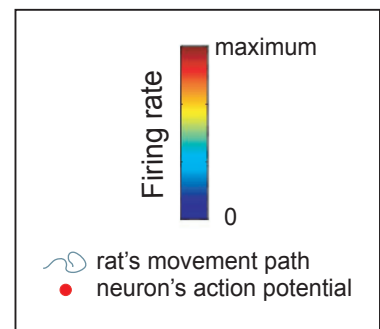

Supplement: pbio.1000089.sg005.pdf [file pbio.1000089.sg005.pdf]

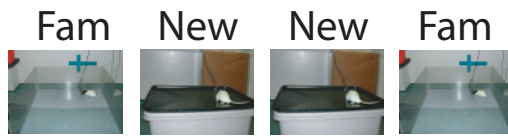

 Septal sparing

 Intact hippoc.

Rat 10

Rat 4

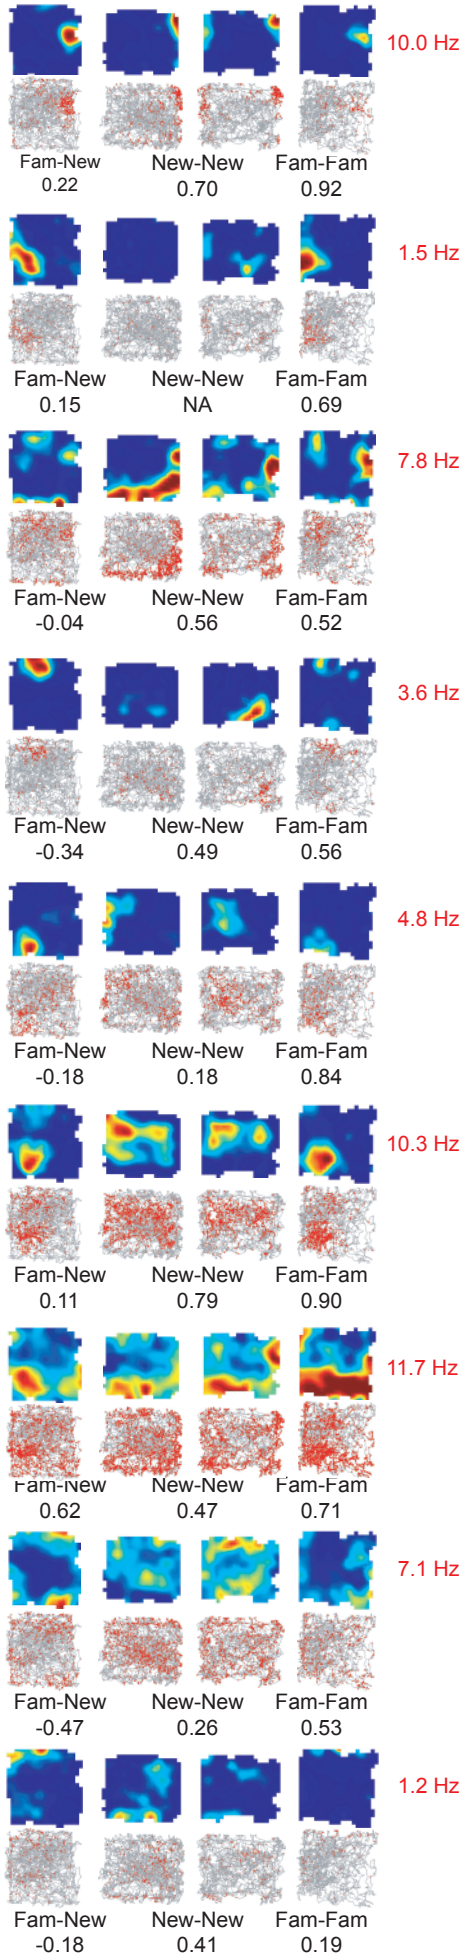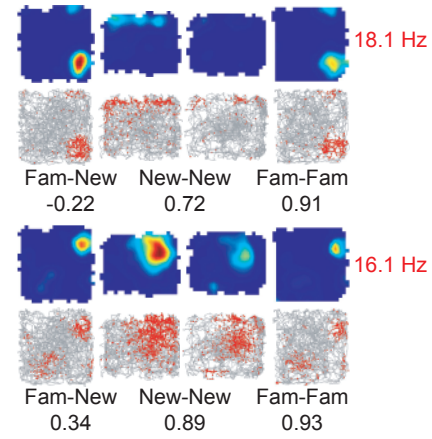

Rat 14

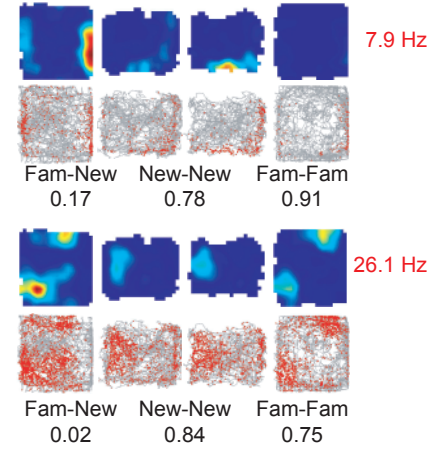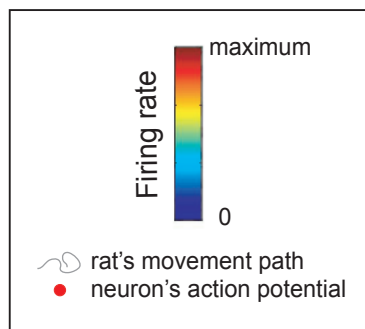

Supplement: pbio.1000089.sg006.pdf [file pbio.1000089.sg006.pdf]

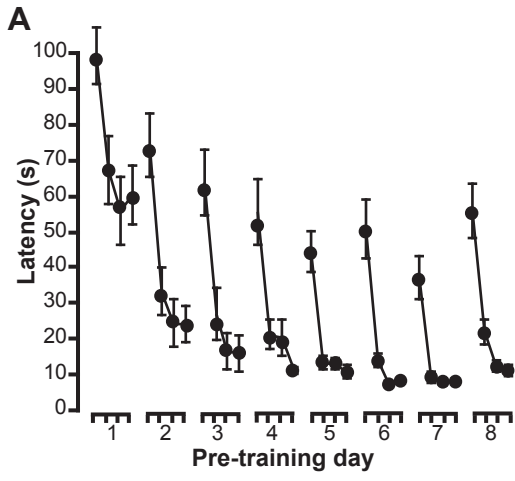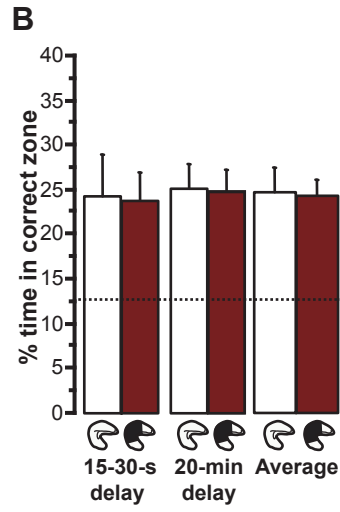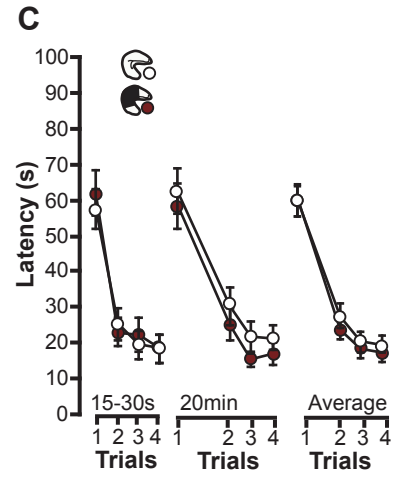

Supplement: pbio.1000089.sg007.pdf [file pbio.1000089.sg007.pdf]

**A**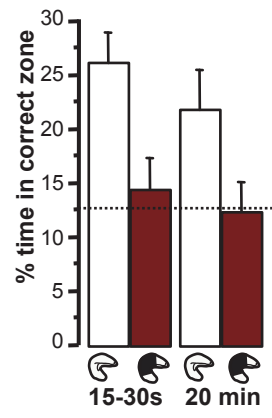**B**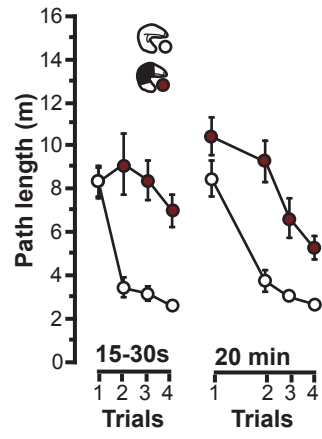

Supplement: pbio.1000089.sg008.pdf [file pbio.1000089.sg008.pdf]
